# Supplementary material
Source: publisher figshare collection journal article supplement (https://frontiersin.figshare.com/ndownloader/files/14765405)
Supplement: Supplementary file 1 [file 14765405]

## Sheet: Munka1
species	1975	1976	1977	1978	1979	1980	1981	1982	1983	1984	1985	1986	1987	1988	1989	1990	1991	1992	1993	1994	1995	1996	1997	1998	1999	2000	2001	2002	2003	2004	2005	2006	datayears	startgap	analyzed
Acrocephalus arundinaceus	fad	fad	fad	fad	fad	fad	fad	no	fad	fad	fad	fad	fad	fad	fad	fad	fad	fad	fad	fad	fad	fad	fad	fad	fad	fad	fad	fad	fad	fad	fad	fad	31	0	yes
Acrocephalus melanopogon	no	no	fad	fad	fad	fad	fad	fad	fad	fad	fad	fad	fad	fad	fad	fad	fad	fad	fad	fad	fad	fad	fad	fad	fad	fad	fad	fad	fad	fad	fad	fad	30	2	yes
Acrocephalus paludicola	no	no	no	fad	no	no	fad	no	fad	no	fad	no	no	fad	fad	fad	fad	fad	fad	fad	fad	fad	fad	fad	fad	fad	fad	fad	fad	fad	fad	no	22	3	yes
Acrocephalus schoenobaenus	fad	fad	fad	fad	fad	fad	fad	fad	fad	fad	fad	fad	fad	fad	fad	fad	fad	fad	fad	fad	fad	fad	fad	fad	fad	fad	fad	fad	fad	fad	fad	fad	32	0	yes
Acrocephalus scirpaceus	fad	fad	fad	fad	fad	fad	fad	fad	fad	fad	fad	fad	fad	fad	fad	fad	fad	fad	fad	fad	fad	fad	fad	no	no	no	no	fad	fad	fad	fad	fad	28	0	yes
Actitis hypoleucos	fad	fad	fad	fad	no	fad	fad	fad	fad	fad	fad	fad	fad	fad	fad	fad	fad	fad	fad	fad	fad	fad	fad	fad	fad	no	fad	fad	fad	fad	fad	fad	30	0	yes
Alauda arvensis	fad	fad	fad	ow	fad	fad	fad	fad	fad	fad	fad	fad	fad	fad	fad	fad	fad	fad	fad	fad	fad	fad	ow	ow	ow	fad	ow	fad	fad	ow	ow	ow	32	0	yes
Anas clypeata	fad	fad	fad	fad	fad	fad	fad	fad	fad	fad	fad	fad	fad	fad	fad	fad	fad	fad	fad	fad	fad	fad	fad	fad	fad	fad	fad	fad	fad	fad	fad	fad	32	0	yes
Anas crecca	fad	fad	fad	fad	fad	fad	fad	fad	ow	fad	fad	fad	fad	fad	fad	fad	fad	fad	fad	no	ow	fad	fad	fad	fad	fad	ow	fad	fad	fad	fad	fad	31	0	yes
Anas penelope	fad	fad	fad	fad	fad	fad	fad	fad	ow	ow	fad	fad	fad	fad	fad	fad	fad	fad	fad	fad	fad	fad	fad	fad	fad	fad	fad	fad	fad	fad	fad	fad	32	0	yes
Anas platyrhynchos	ow	fad	fad	ow	ow	fad	fad	fad	ow	fad	fad	fad	fad	ow	ow	ow	ow	ow	ow	ow	ow	ow	fad	ow	ow	fad	ow	ow	fad	fad	ow	fad	32	0	yes
Anas querquedula	fad	fad	fad	fad	fad	fad	fad	fad	fad	fad	fad	fad	fad	fad	fad	fad	fad	fad	fad	fad	fad	fad	fad	fad	fad	fad	fad	fad	fad	fad	fad	fad	32	0	yes
Anas strepera	fad	fad	fad	fad	fad	fad	fad	fad	fad	fad	fad	fad	no	fad	fad	fad	fad	fad	fad	fad	fad	fad	fad	fad	fad	fad	fad	fad	fad	fad	fad	fad	31	0	yes
Anser anser	fad	fad	fad	fad	fad	fad	fad	fad	ow	fad	fad	fad	fad	fad	fad	fad	ow	ow	fad	ow	ow	ow	ow	ow	ow	fad	ow	fad	fad	ow	ow	ow	32	0	yes
Anthus campestris	fad	fad	fad	fad	fad	fad	fad	fad	fad	fad	fad	fad	fad	fad	fad	fad	fad	fad	fad	fad	fad	fad	fad	fad	fad	fad	fad	fad	fad	fad	fad	fad	32	0	yes
Anthus cervinus	fad	fad	fad	fad	no	no	no	fad	fad	no	fad	fad	fad	fad	fad	fad	fad	fad	fad	fad	fad	fad	fad	fad	fad	fad	fad	fad	fad	fad	fad	fad	28	0	yes
Anthus pratensis	fad	fad	fad	fad	fad	fad	fad	fad	ow	fad	fad	ow	fad	fad	ow	ow	ow	ow	ow	ow	ow	fad	fad	fad	fad	fad	ow	fad	fad	ow	fad	ow	32	0	yes
Anthus trivialis	fad	no	no	fad	fad	fad	fad	fad	no	fad	fad	fad	fad	fad	fad	fad	fad	fad	fad	fad	fad	fad	fad	fad	fad	fad	fad	fad	fad	fad	fad	fad	29	0	yes
Aquila pomarina	no	no	fad	no	no	no	fad	fad	no	fad	fad	fad	fad	fad	no	no	no	no	fad	fad	no	fad	no	fad	fad	no	no	no	fad	fad	fad	fad	17	2	yes
Ardea cinerea	no	fad	fad	fad	fad	fad	fad	fad	fad	fad	fad	fad	fad	fad	fad	ow	ow	ow	ow	no	ow	ow	ow	ow	ow	ow	ow	ow	ow	ow	ow	ow	30	1	yes
Ardea purpurea	fad	fad	fad	fad	fad	fad	fad	fad	fad	fad	fad	fad	fad	fad	fad	fad	fad	fad	fad	fad	fad	fad	fad	fad	fad	fad	fad	fad	fad	fad	fad	fad	32	0	yes
Ardeola ralloides	fad	no	fad	fad	fad	no	fad	fad	fad	no	fad	fad	fad	no	fad	fad	no	fad	fad	fad	fad	fad	fad	fad	fad	fad	fad	fad	fad	fad	fad	fad	27	0	yes
Aythya ferina	fad	fad	fad	fad	fad	fad	fad	fad	fad	no	fad	fad	no	fad	fad	fad	fad	fad	fad	ow	fad	fad	fad	fad	fad	fad	fad	fad	fad	fad	fad	fad	30	0	yes
Aythya fuligula	fad	fad	fad	fad	fad	fad	fad	fad	ow	fad	ow	fad	fad	fad	fad	fad	fad	fad	fad	ow	fad	fad	fad	fad	fad	fad	fad	ow	fad	fad	fad	fad	32	0	yes
Aythya nyroca	fad	fad	fad	fad	fad	fad	fad	fad	fad	fad	no	fad	fad	fad	fad	fad	fad	fad	fad	fad	fad	fad	fad	fad	fad	fad	fad	fad	fad	fad	fad	fad	31	0	yes
Burhinus oedicnemus	no	no	fad	fad	fad	fad	fad	fad	fad	fad	fad	fad	fad	fad	fad	fad	fad	fad	fad	fad	fad	fad	fad	fad	fad	fad	fad	fad	fad	fad	fad	fad	30	2	yes
Calidris alpina	no	fad	fad	fad	fad	fad	fad	fad	fad	fad	fad	no	fad	fad	fad	fad	fad	fad	fad	fad	fad	fad	fad	fad	fad	fad	fad	fad	fad	fad	fad	fad	30	1	yes
Charadrius dubius	fad	fad	no	no	no	no	no	no	no	fad	fad	fad	fad	fad	fad	fad	fad	fad	fad	no	fad	fad	fad	fad	fad	fad	no	fad	fad	fad	fad	no	22	0	yes
Chlidonias hybridus	no	no	fad	fad	fad	fad	fad	fad	fad	fad	fad	fad	fad	fad	fad	fad	fad	fad	fad	fad	fad	fad	fad	fad	fad	fad	fad	fad	fad	fad	fad	fad	30	2	yes
Chlidonias leucopterus	fad	fad	fad	fad	fad	fad	fad	fad	fad	fad	fad	fad	fad	fad	fad	fad	fad	fad	fad	fad	fad	fad	fad	fad	fad	fad	fad	fad	fad	fad	fad	fad	32	0	yes
Chlidonias niger	fad	fad	fad	fad	fad	fad	fad	fad	fad	fad	fad	fad	fad	fad	fad	fad	fad	fad	fad	fad	fad	fad	fad	fad	fad	fad	fad	fad	fad	fad	fad	fad	32	0	yes
Ciconia ciconia	fad	fad	fad	fad	fad	fad	fad	fad	fad	fad	fad	fad	fad	fad	fad	fad	fad	fad	fad	fad	ow	fad	fad	fad	fad	fad	fad	fad	fad	fad	fad	fad	32	0	yes
Ciconia nigra	no	no	fad	fad	no	no	fad	no	no	fad	no	fad	no	no	fad	fad	fad	fad	fad	fad	fad	no	fad	fad	no	fad	fad	fad	fad	fad	no	fad	20	2	yes
Circus aeruginosus	fad	fad	fad	fad	fad	fad	fad	fad	fad	fad	fad	fad	fad	fad	fad	fad	fad	fad	fad	fad	fad	fad	fad	ow	fad	fad	fad	ow	fad	fad	fad	ow	32	0	yes
Circus pygargus	no	no	fad	fad	no	no	fad	fad	fad	fad	fad	no	no	no	fad	fad	fad	fad	fad	fad	fad	fad	fad	fad	fad	fad	fad	fad	fad	fad	fad	fad	25	2	yes
Columba palumbus	fad	fad	no	fad	no	no	no	no	fad	no	no	fad	no	no	fad	fad	fad	fad	fad	fad	fad	fad	fad	fad	fad	fad	fad	fad	fad	fad	fad	fad	23	0	yes
Coturnix coturnix	fad	fad	no	no	fad	fad	fad	no	fad	fad	fad	fad	fad	fad	no	fad	fad	fad	fad	fad	fad	fad	fad	fad	fad	fad	ow	fad	fad	fad	fad	fad	28	0	yes
Cuculus canorus	fad	fad	fad	fad	fad	fad	fad	fad	fad	fad	fad	fad	fad	fad	fad	fad	fad	fad	fad	fad	fad	fad	fad	fad	fad	fad	fad	fad	fad	fad	fad	fad	32	0	yes(no)
Delichon urbica	fad	fad	no	fad	no	fad	fad	no	fad	fad	fad	no	fad	fad	fad	fad	fad	fad	fad	fad	fad	fad	fad	fad	fad	fad	fad	fad	fad	fad	fad	fad	28	0	yes
Egretta alba	no	fad	fad	fad	fad	fad	fad	fad	ow	fad	ow	fad	fad	fad	ow	fad	fad	fad	fad	ow	ow	fad	fad	ow	fad	fad	ow	ow	fad	fad	fad	fad	31	1	yes
Egretta garzetta	fad	fad	fad	no	fad	no	fad	fad	fad	fad	fad	fad	fad	fad	fad	fad	fad	fad	fad	fad	fad	fad	fad	fad	fad	fad	fad	fad	fad	fad	fad	fad	30	0	yes
Erithacus rubecula	no	fad	fad	fad	fad	fad	fad	fad	fad	fad	fad	fad	fad	fad	fad	ow	fad	fad	fad	fad	fad	fad	fad	fad	ow	fad	fad	fad	fad	fad	fad	fad	31	1	yes
Falco subbuteo	no	no	fad	fad	fad	fad	fad	fad	fad	no	fad	fad	fad	fad	no	fad	fad	fad	fad	fad	fad	fad	fad	fad	fad	fad	fad	fad	fad	fad	fad	fad	28	2	yes
Falco vespertinus	fad	fad	fad	fad	fad	fad	fad	fad	fad	fad	fad	fad	fad	fad	fad	fad	fad	fad	fad	fad	fad	fad	fad	fad	fad	fad	fad	fad	fad	fad	fad	fad	32	0	yes
Ficedula hypoleuca	fad	no	no	fad	no	fad	fad	fad	no	fad	fad	fad	fad	fad	no	fad	fad	fad	fad	fad	fad	fad	fad	fad	fad	fad	fad	fad	fad	fad	fad	fad	27	0	yes
Fringilla coelebs	ow	fad	fad	fad	fad	ow	fad	ow	fad	fad	fad	fad	fad	fad	fad	fad	ow	ow	fad	fad	fad	ow	fad	fad	fad	ow	ow	ow	fad	fad	fad	ow	32	0	yes
Fulica atra	fad	fad	fad	fad	fad	fad	fad	fad	fad	fad	fad	fad	fad	fad	fad	fad	fad	fad	fad	fad	fad	fad	fad	ow	fad	fad	fad	fad	fad	fad	ow	fad	32	0	yes
Gallinago gallinago	fad	fad	fad	fad	fad	fad	fad	fad	fad	fad	fad	fad	fad	fad	fad	fad	fad	fad	fad	ow	fad	fad	fad	fad	fad	fad	fad	fad	fad	fad	fad	fad	32	0	yes
Gallinula chloropus	fad	fad	fad	fad	ow	fad	fad	fad	ow	fad	no	fad	fad	fad	ow	fad	fad	fad	fad	fad	fad	fad	fad	fad	fad	fad	fad	fad	fad	fad	fad	fad	31	0	yes
Glareola pratincola	fad	fad	fad	fad	fad	fad	fad	fad	fad	fad	fad	fad	fad	fad	fad	fad	fad	fad	fad	fad	fad	no	fad	fad	fad	no	fad	fad	no	fad	fad	fad	29	0	yes
Grus grus	fad	fad	fad	fad	fad	fad	fad	fad	fad	fad	fad	fad	fad	fad	fad	fad	fad	fad	fad	fad	fad	fad	fad	fad	fad	fad	ow	fad	fad	fad	fad	ow	32	0	yes
Himantopus himantopus	no	fad	fad	no	no	no	no	no	no	fad	no	fad	no	fad	fad	fad	fad	no	fad	fad	fad	fad	fad	fad	fad	fad	fad	fad	fad	no	fad	fad	21	1	yes
Hirundo rustica	fad	fad	fad	fad	fad	fad	fad	fad	fad	fad	fad	fad	fad	fad	fad	fad	fad	fad	fad	fad	fad	fad	fad	fad	fad	fad	fad	fad	fad	fad	fad	fad	32	0	yes
Ixobrychus minutus	no	no	no	fad	fad	no	no	no	fad	fad	no	fad	fad	no	fad	fad	fad	fad	fad	no	fad	no	fad	no	fad	fad	fad	fad	fad	fad	fad	fad	21	3	yes
Jynx torquilla	fad	fad	fad	fad	no	no	no	no	fad	fad	no	no	no	no	no	fad	fad	fad	fad	no	fad	no	fad	fad	fad	fad	fad	no	fad	fad	no	fad	19	0	yes
Lanius collurio	fad	fad	no	no	fad	no	fad	no	fad	no	fad	fad	fad	fad	fad	fad	fad	fad	fad	fad	fad	fad	fad	fad	fad	no	fad	fad	fad	fad	fad	fad	26	0	yes
Lanius minor	fad	fad	fad	no	no	no	no	no	no	fad	no	fad	no	no	fad	fad	fad	fad	fad	fad	fad	fad	fad	fad	fad	no	fad	fad	fad	fad	fad	fad	22	0	yes
Larus cachinnans	fad	fad	fad	fad	fad	fad	fad	fad	fad	ow	fad	fad	fad	ow	ow	ow	ow	ow	ow	ow	ow	fad	fad	ow	ow	fad	ow	ow	no	fad	fad	fad	31	0	yes
Larus ridibundus	fad	fad	fad	fad	fad	fad	fad	fad	ow	fad	fad	fad	fad	fad	fad	fad	fad	fad	fad	no	ow	ow	ow	ow	ow	fad	fad	fad	fad	fad	fad	fad	31	0	yes
Limosa limosa	fad	fad	no	no	no	no	fad	fad	fad	fad	fad	fad	fad	fad	fad	fad	fad	fad	fad	fad	fad	fad	fad	fad	fad	fad	fad	fad	fad	fad	fad	fad	28	0	yes
Luscinia luscinia	fad	no	fad	fad	no	no	fad	fad	fad	no	fad	no	fad	fad	no	fad	fad	fad	fad	fad	fad	fad	fad	fad	fad	fad	fad	fad	fad	fad	fad	fad	26	0	yes
Luscinia svecica	no	fad	fad	fad	no	no	fad	fad	fad	fad	fad	fad	fad	fad	fad	fad	fad	fad	fad	fad	fad	fad	fad	fad	fad	fad	fad	fad	fad	fad	fad	fad	29	1	yes
Motacilla alba	fad	fad	fad	fad	fad	fad	fad	fad	fad	fad	fad	fad	fad	fad	fad	fad	fad	fad	fad	fad	fad	fad	fad	fad	fad	fad	fad	fad	fad	fad	fad	fad	32	0	yes
Motacilla flava	fad	fad	fad	fad	fad	fad	fad	fad	fad	fad	fad	fad	fad	fad	fad	fad	fad	fad	fad	fad	fad	fad	fad	fad	fad	fad	fad	fad	fad	fad	fad	fad	32	0	yes
Muscicapa striata	fad	fad	no	no	no	fad	fad	no	fad	no	no	fad	fad	fad	fad	fad	fad	no	fad	fad	fad	fad	fad	fad	no	no	fad	no	fad	no	fad	fad	21	0	yes
Numenius arquata	fad	fad	fad	fad	fad	fad	fad	fad	fad	fad	fad	ow	fad	fad	fad	fad	ow	fad	fad	ow	ow	fad	fad	ow	fad	fad	fad	fad	fad	fad	ow	fad	32	0	yes
Numenius phaeopus	fad	fad	fad	fad	fad	fad	fad	fad	fad	fad	fad	fad	fad	fad	fad	fad	fad	fad	fad	fad	fad	fad	fad	fad	fad	fad	fad	fad	fad	fad	fad	fad	32	0	yes
Nycticorax nycticorax	no	no	fad	fad	no	fad	fad	fad	no	no	fad	fad	fad	fad	fad	fad	fad	fad	fad	fad	fad	fad	fad	fad	fad	fad	fad	fad	fad	fad	fad	fad	27	2	yes
Oenanthe oenanthe	no	fad	fad	fad	fad	fad	fad	fad	fad	fad	fad	fad	fad	fad	fad	fad	fad	fad	fad	fad	fad	fad	fad	fad	fad	fad	fad	fad	fad	fad	fad	fad	31	1	yes
Oriolus oriolus	fad	fad	fad	fad	fad	no	fad	no	fad	fad	fad	fad	fad	no	fad	fad	fad	no	fad	fad	fad	fad	fad	no	fad	fad	fad	fad	fad	fad	fad	fad	27	0	yes
Philomachus pugnax	fad	fad	fad	fad	fad	fad	fad	fad	fad	fad	fad	fad	fad	fad	fad	fad	fad	fad	fad	fad	fad	fad	fad	fad	fad	fad	fad	fad	fad	fad	fad	fad	32	0	yes
Phoenicurus ochruros	no	no	fad	fad	fad	fad	fad	fad	fad	fad	fad	fad	fad	fad	fad	fad	fad	fad	fad	fad	fad	fad	fad	ow	fad	ow	fad	fad	fad	fad	fad	ow	30	2	yes
Phylloscopus collybita	fad	fad	fad	fad	fad	fad	fad	fad	fad	fad	fad	fad	fad	fad	fad	fad	fad	fad	fad	fad	fad	fad	fad	fad	fad	fad	fad	fad	fad	fad	fad	fad	32	0	yes
Phylloscopus sibilatrix	fad	no	fad	no	no	no	no	fad	no	no	fad	fad	fad	fad	no	fad	fad	fad	fad	fad	fad	fad	fad	no	fad	fad	fad	no	fad	fad	fad	fad	22	0	yes
Phylloscopus trochilus	fad	fad	fad	fad	no	fad	no	no	no	fad	fad	no	fad	no	no	fad	fad	fad	fad	fad	no	fad	fad	fad	fad	fad	fad	fad	fad	no	fad	fad	23	0	yes
Platalea leucorodia	fad	fad	fad	fad	fad	fad	fad	fad	fad	fad	fad	fad	fad	fad	fad	fad	fad	fad	fad	fad	fad	fad	fad	fad	fad	fad	fad	fad	fad	fad	fad	fad	32	0	yes
Plegadis falcinellus	fad	no	no	fad	no	no	no	fad	no	no	no	no	fad	fad	no	no	fad	fad	fad	fad	fad	no	fad	no	fad	fad	fad	fad	fad	fad	fad	fad	19	0	yes
Pluvialis apricaria	fad	no	fad	fad	fad	fad	fad	fad	fad	fad	fad	fad	fad	fad	fad	fad	fad	fad	fad	fad	fad	fad	fad	fad	fad	fad	fad	fad	fad	fad	fad	fad	31	0	yes
Podiceps cristatus	no	fad	fad	no	no	no	fad	fad	fad	fad	fad	no	fad	fad	fad	fad	fad	fad	fad	fad	fad	fad	fad	fad	fad	fad	fad	fad	fad	fad	fad	fad	27	1	yes
Podiceps grisegena	fad	fad	fad	fad	fad	fad	fad	fad	fad	fad	fad	fad	no	fad	fad	fad	fad	fad	fad	fad	fad	fad	fad	fad	fad	fad	fad	fad	fad	fad	fad	fad	31	0	yes
Podiceps nigricollis	fad	fad	fad	fad	fad	fad	fad	fad	fad	fad	fad	fad	fad	fad	fad	fad	fad	fad	fad	fad	fad	fad	fad	fad	fad	fad	fad	fad	fad	fad	fad	fad	32	0	yes
Podiceps ruficollis	fad	fad	fad	fad	fad	fad	fad	fad	fad	fad	no	fad	fad	fad	fad	fad	fad	fad	fad	fad	fad	fad	fad	fad	fad	fad	fad	fad	fad	fad	fad	fad	31	0	yes
Porzana parva	no	no	fad	fad	fad	fad	fad	fad	fad	fad	fad	fad	fad	fad	fad	fad	fad	fad	fad	fad	fad	fad	fad	fad	fad	fad	fad	fad	fad	fad	fad	fad	30	2	yes
Porzana porzana	no	no	fad	fad	fad	fad	fad	fad	fad	no	fad	fad	fad	fad	no	fad	fad	fad	fad	fad	fad	fad	fad	fad	fad	fad	fad	no	fad	fad	fad	fad	27	2	yes
Prunella modularis	no	fad	fad	fad	fad	no	no	no	no	no	no	fad	no	no	fad	fad	fad	fad	fad	no	no	fad	fad	no	fad	fad	fad	fad	no	fad	no	fad	18	1	yes
Rallus aquaticus	fad	fad	no	ow	fad	ow	ow	ow	ow	ow	ow	ow	fad	fad	fad	ow	ow	ow	ow	ow	ow	ow	fad	ow	ow	ow	ow	ow	fad	ow	ow	ow	31	0	yes
Recurvirostra avosetta	fad	fad	fad	fad	no	fad	fad	fad	fad	fad	no	fad	fad	fad	fad	fad	fad	fad	fad	fad	fad	fad	fad	fad	no	fad	fad	fad	fad	fad	fad	fad	29	0	yes
Riparia riparia	fad	fad	fad	fad	fad	fad	fad	fad	fad	fad	fad	no	no	fad	fad	fad	fad	fad	fad	fad	fad	fad	fad	fad	fad	fad	fad	fad	fad	fad	fad	fad	30	0	yes
Saxicola rubetra	fad	fad	fad	fad	no	fad	fad	fad	no	fad	fad	fad	fad	no	no	fad	fad	fad	fad	fad	fad	fad	fad	fad	fad	no	fad	fad	fad	fad	fad	fad	27	0	yes
Saxicola torquata	no	fad	fad	fad	fad	no	no	no	fad	fad	fad	fad	fad	fad	fad	fad	fad	fad	fad	fad	fad	fad	fad	fad	fad	fad	fad	fad	fad	fad	fad	fad	28	1	yes
Serinus serinus	no	fad	fad	no	fad	no	fad	no	fad	fad	no	no	fad	no	no	fad	fad	fad	fad	fad	fad	fad	fad	fad	fad	fad	fad	fad	fad	fad	fad	fad	24	1	yes
Streptopelia turtur	fad	fad	fad	fad	fad	fad	fad	fad	fad	fad	fad	fad	fad	fad	fad	fad	fad	fad	fad	fad	fad	fad	fad	fad	fad	fad	fad	fad	fad	fad	fad	fad	32	0	yes
Sturnus vulgaris	fad	fad	fad	ow	fad	fad	fad	fad	fad	fad	fad	fad	fad	fad	fad	fad	ow	ow	ow	ow	ow	ow	ow	ow	fad	fad	ow	ow	fad	ow	ow	ow	32	0	yes
Sylvia atricapilla	fad	no	no	fad	no	no	fad	no	fad	fad	fad	fad	fad	fad	no	fad	fad	fad	fad	fad	fad	fad	fad	fad	fad	fad	fad	fad	fad	fad	fad	fad	26	0	yes
Sylvia communis	fad	fad	fad	fad	fad	no	no	fad	fad	no	fad	no	fad	fad	fad	fad	fad	fad	fad	fad	fad	fad	fad	fad	fad	fad	fad	fad	fad	fad	fad	fad	28	0	yes
Sylvia curruca	no	fad	fad	fad	no	no	no	fad	no	no	fad	fad	fad	no	no	fad	fad	fad	fad	fad	fad	fad	fad	fad	fad	fad	fad	fad	fad	fad	fad	fad	24	1	yes
Tringa erythropus	fad	fad	fad	fad	fad	fad	fad	fad	fad	fad	fad	fad	fad	fad	fad	fad	fad	fad	fad	fad	fad	fad	no	fad	fad	fad	fad	fad	fad	fad	fad	fad	31	0	yes
Tringa glareola	fad	fad	fad	fad	fad	fad	fad	fad	fad	fad	fad	fad	fad	fad	fad	fad	fad	fad	fad	fad	fad	fad	fad	fad	fad	fad	fad	fad	fad	fad	fad	fad	32	0	yes
Tringa nebularia	fad	fad	fad	fad	fad	fad	fad	fad	fad	fad	fad	fad	fad	no	fad	fad	fad	fad	fad	fad	fad	fad	fad	fad	fad	fad	fad	fad	fad	fad	fad	fad	31	0	yes
Tringa ochropus	fad	fad	fad	fad	no	no	fad	fad	fad	fad	no	fad	fad	fad	fad	fad	fad	fad	fad	fad	fad	fad	fad	no	fad	fad	fad	fad	fad	fad	fad	ow	28	0	yes
Tringa stagnatilis	no	fad	fad	no	no	no	no	no	no	fad	no	fad	fad	fad	fad	fad	no	fad	fad	fad	fad	fad	fad	fad	fad	fad	fad	fad	fad	fad	fad	fad	23	1	yes
Tringa totanus	fad	fad	fad	fad	fad	fad	fad	fad	no	fad	fad	fad	fad	fad	fad	fad	fad	fad	fad	fad	fad	fad	fad	fad	fad	fad	fad	fad	fad	fad	fad	fad	31	0	yes
Turdus iliacus	fad	fad	fad	fad	fad	no	fad	fad	fad	fad	no	no	fad	fad	fad	fad	fad	fad	fad	fad	fad	fad	fad	fad	fad	fad	fad	fad	fad	fad	fad	fad	29	0	yes
Turdus merula	ow	fad	fad	ow	ow	ow	fad	ow	fad	no	fad	fad	no	fad	fad	fad	ow	ow	ow	ow	ow	ow	ow	ow	ow	ow	ow	ow	ow	ow	ow	ow	30	0	yes
Turdus philomelos	fad	fad	fad	fad	fad	no	fad	fad	fad	fad	fad	fad	fad	fad	fad	fad	fad	fad	fad	fad	fad	fad	fad	fad	fad	fad	fad	fad	fad	fad	fad	fad	31	0	yes
Turdus torquatus	no	no	fad	fad	no	no	fad	no	fad	fad	no	no	fad	no	fad	no	fad	no	fad	fad	fad	no	fad	fad	no	fad	fad	fad	fad	fad	fad	fad	20	1	yes
Upupa epops	fad	fad	fad	fad	fad	fad	fad	fad	fad	fad	fad	fad	fad	fad	fad	fad	fad	fad	fad	fad	fad	fad	fad	fad	fad	fad	fad	fad	fad	fad	fad	fad	32	0	yes
Vanellus vanellus	fad	fad	fad	fad	fad	fad	fad	fad	fad	fad	fad	fad	fad	fad	fad	fad	fad	fad	fad	ow	fad	fad	fad	fad	fad	fad	fad	fad	fad	fad	fad	fad	32	0	yes
Calidris ferruginea	no	fad	no	no	no	no	no	fad	no	no	no	no	fad	fad	no	no	no	fad	fad	no	fad	fad	no	fad	fad	no	fad	fad	fad	fad	no	fad	15	1	no
Calidris minuta	fad	fad	no	no	no	no	fad	no	no	no	fad	fad	no	no	fad	fad	fad	fad	no	no	fad	no	fad	fad	no	no	no	fad	fad	fad	no	no	15	0	no
Charadrius hiaticula	no	fad	no	no	no	fad	no	no	no	fad	no	no	no	no	fad	no	fad	fad	fad	fad	no	no	fad	no	fad	no	no	fad	fad	fad	fad	fad	15	1	no
Circus macrourus	no	no	no	no	no	no	no	no	no	no	no	fad	fad	no	no	fad	fad	fad	fad	fad	fad	no	fad	fad	fad	fad	fad	fad	fad	fad	fad	fad	18	11	no
Ficedula albicollis	fad	fad	no	no	no	no	no	no	fad	no	fad	fad	fad	fad	no	fad	fad	no	fad	no	fad	no	no	no	no	no	fad	fad	fad	fad	fad	no	16	0	no
Locustella fluviatilis	no	no	no	no	no	no	no	no	no	fad	no	fad	no	fad	fad	fad	no	no	fad	no	fad	fad	fad	fad	fad	no	fad	fad	fad	fad	fad	fad	17	9	no
Locustella luscinioides	no	no	no	no	no	no	no	no	fad	no	fad	fad	fad	fad	fad	fad	fad	fad	fad	fad	fad	fad	fad	fad	fad	fad	fad	fad	fad	fad	fad	fad	23	8	no
Merops apiaster	no	no	no	no	no	no	no	no	no	no	no	no	no	fad	no	fad	fad	no	fad	fad	fad	fad	fad	fad	fad	no	fad	fad	fad	fad	fad	fad	16	13	no
Sterna hirundo	no	no	no	no	no	no	no	no	no	no	no	fad	fad	no	fad	fad	no	fad	no	no	fad	fad	fad	fad	fad	fad	fad	fad	fad	fad	fad	fad	17	11	no
